# Supplementary material for: Value and Price of Multi-indication Cancer Drugs in the USA, Germany, France, England, Canada, Australia, and Scotland
Source: PubMed Central journal article supplement — Appl Health Econ Health Policy. 2022 Jul 11;20(5):757–68. doi: 10.1007/s40258-022-00737-w (PMC9385843; doi:10.1007/s40258-022-00737-w), 2022-07-11
Supplement: 40258_2022_737_MOESM1_ESM.pdf [file 40258_2022_737_MOESM1_ESM.pdf]

## Supplementary Online Content 1

Michaeli DT, Mills M, Kanavos P (2022). Value and Price of Multi-Indication Cancer Drugs in the USA, Germany, France, England, Canada, Australia, and Scotland. *Applied Health Economics and Health Policy*. <https://doi.org/10.1007/s40258-022-00737-w>

|                 |                                                                   |
|-----------------|-------------------------------------------------------------------|
| <b>Table e1</b> | Data sources                                                      |
| <b>Table e2</b> | Definition and source for all collected variables                 |
| <b>Table e3</b> | Classification of health technology assessment outcomes by agency |
| <b>Table e4</b> | Sample of multi-indication cancer drugs                           |
| <b>Table e5</b> | Sample overview                                                   |
| <b>Table e6</b> | Number of indication launches by country                          |

This supplementary material has been provided by the authors to give readers additional information about their work.

### Declarations

**Funding:** Novartis Pharmaceuticals Corporation, an affiliate of Novartis AG, provided access to the IQVIA sales database.

**Conflict of interest:** The authors declare no conflict of interest.

**Correspondence:** Daniel Tobias Michaeli at University Hospital Mannheim, Heidelberg University in Germany ([danielmichaeli@yahoo.com](mailto:danielmichaeli@yahoo.com)) and Panos Kanavos at the London School of Economics and Political Science in the UK ([p.g.kanavos@lse.ac.uk](mailto:p.g.kanavos@lse.ac.uk)).

| Country   | Agency | Website                                                                                                                                                                                                                             |
|-----------|--------|-------------------------------------------------------------------------------------------------------------------------------------------------------------------------------------------------------------------------------------|
| England   | NICE   | <a href="https://www.nice.org.uk/">https://www.nice.org.uk/</a>                                                                                                                                                                     |
| Scotland  | SMC    | <a href="https://www.scottishmedicines.org.uk/">https://www.scottishmedicines.org.uk/</a>                                                                                                                                           |
| France    | HAS    | <a href="https://www.has-sante.fr/">https://www.has-sante.fr/</a>                                                                                                                                                                   |
| Germany   | G-BA   | <a href="https://www.g-ba.de/">https://www.g-ba.de/</a>                                                                                                                                                                             |
| Canada    | CADTH  | <a href="https://www.cadth.ca/">https://www.cadth.ca/</a>                                                                                                                                                                           |
| Australia | PBAC   | <a href="http://www.pbs.gov.au/info/industry/listing/elements/pbac-meetings/psd/public-summary-documents-by-product">http://www.pbs.gov.au/info/industry/listing/elements/pbac-meetings/psd/public-summary-documents-by-product</a> |
| USA       | FDA    | <a href="https://www.accessdata.fda.gov/scripts/cder/daf/">https://www.accessdata.fda.gov/scripts/cder/daf/</a>                                                                                                                     |

**Table e1** Data sources

CADTH: Canadian Agency for Drugs and Technologies in Health; FDA: US Food & Drug Administration; G-BA: Federal joint Committee (“*Gemeinsamer Bundesausschuss*”); HAS: Haute Autorité de Santé; NICE: National Institute for Health and Care Excellence; PBAC: Pharmaceutical Benefits Advisory Committee; SMC: Scottish Medicines Consortium.

| <b>Variable</b>          | <b>Definition</b>                                                                                                     | <b>Source <sup>a</sup></b>     |
|--------------------------|-----------------------------------------------------------------------------------------------------------------------|--------------------------------|
| HTA outcome              | Reimbursement decision by the respective HTA agency                                                                   | HTA Report                     |
| HTA approval date        | Date of the HTA outcome                                                                                               | HTA Report                     |
| HTA economic restriction | Financial or outcome-based restriction associated with the HTA outcome                                                | HTA Report                     |
| HTA clinical restriction | Dosing or population-based restriction associated with the HTA outcome                                                | HTA Report                     |
| Incremental QALYs gained | Incremental quality-adjusted life year improvement the indication offers relative to the standard of care             | HTA Report                     |
| Incremental LYs gained   | Incremental life year improvement the indication offers relative to the standard of care                              | HTA Report                     |
| ICER                     | Main (base case) incremental cost-effectiveness ratio calculated for each indication relative to the standard of care | HTA Report                     |
| Disease prevalence       | Country specific disease prevalence rate per 100,000 inhabitants                                                      | Global Burden of Disease, 2017 |
| Drug list price          | List price of the respective drug in each country extracted after each indication launch                              | IQVIA Sales                    |

**Table e2** Definition and source for all collected variables

ICER: incremental cost-effectiveness ratio; HTA: health technology assessment; LY: life year; QALY: quality-adjusted life year.

<sup>a</sup>: Given the lack of a formal HTA process in the US, data on QALYs, LYs, and ICERs were retrieved from a peer-reviewed literature search of economic evaluations for all included indications.

| Agency       | Positive                                                     |                                                               | Negative                  | Not                    |
|--------------|--------------------------------------------------------------|---------------------------------------------------------------|---------------------------|------------------------|
|              | List                                                         | List with condition                                           | Do not list               | launched               |
| <b>NICE</b>  | Positive decision without clinical and economic restrictions | Positive decision with any clinical and economic restrictions | Negative decision         | No outcome / withdrawn |
| <b>HAS</b>   | SMR important with ASMR I, II                                | SMR important with ASMR III, IV, V                            | SMR insufficient          | No outcome / withdrawn |
| <b>SMC</b>   | Positive decision without clinical and economic restrictions | Positive decision with any clinical and economic restrictions | Negative decision         | No outcome / withdrawn |
| <b>G-BA</b>  | Major or significant added benefit                           | minor or unquantifiable added benefit                         | No or lower added benefit | No outcome / withdrawn |
| <b>CADTH</b> | Positive decision without clinical and economic restrictions | Positive decision with any clinical and economic restrictions | Negative decision         | No outcome / withdrawn |
| <b>PBAC</b>  | Positive decision without clinical and economic restrictions | Positive decision with any clinical and economic restrictions | Negative decision         | No outcome / withdrawn |

**Table e3** Classification of health technology assessment outcomes by agency

ASMR: Amélioration du Service Médical Rendu; CADTH: Canadian Agency for Drugs and Technologies in Health; G-BA: Federal joint Committee (“*Gemeinsamer Bundesausschuss*”); HAS: Haute Autorité de Santé; NICE: National Institute for Health and Care Excellence; PBAC: Pharmaceutical Benefits Advisory Committee; SMC: Scottish Medicines Consortium; SMR: Service Médical Rendu.

| <b>Molecule</b>     | <b>No. of indications</b> | <b>1<sup>st</sup> FDA approval</b> |
|---------------------|---------------------------|------------------------------------|
| Everolimus          | 7                         | 30.03.2009                         |
| Nintedanib          | 3                         | 15.10.2014                         |
| Aflibercept         | 6                         | 18.11.2011                         |
| Dimethyl fumarate   | 2                         | 27.03.2013                         |
| Ruxolitinib         | 2                         | 16.11.2011                         |
| Pembrolizumab       | 15                        | 04.09.2014                         |
| Cabozantinib        | 4                         | 29.11.2012                         |
| Nivolumab           | 11                        | 22.12.2014                         |
| Atezolizumab        | 6                         | 18.05.2016                         |
| Avelumab            | 3                         | 23.03.2017                         |
| Ramucirumab         | 4                         | 21.04.2014                         |
| Pazopanib           | 2                         | 19.10.2009                         |
| Tisagenlecleucel    | 2                         | 30.08.2017                         |
| Ibrutinib           | 6                         | 13.11.2013                         |
| Regorafenib         | 3                         | 27.09.2012                         |
| Abiraterone Acetate | 3                         | 28.04.2011                         |
| Afatinib            | 2                         | 12.07.2013                         |
| Blinatumomab        | 3                         | 03.12.2014                         |
| Enzalutamide        | 3                         | 31.08.2012                         |
| Rucaparib           | 2                         | 19.12.2016                         |
| Osimertinib         | 2                         | 13.11.2015                         |
| Crizotinib          | 3                         | 26.08.2011                         |
| Bosutinib           | 2                         | 04.09.2012                         |
| Alectinib           | 2                         | 11.12.2015                         |
| Ceritinib           | 2                         | 29.04.2014                         |

**Table e4** Sample of multi-indication cancer drugs

| <b>Variable</b>                                          | <b>No.</b> | <b>(%)</b>      |
|----------------------------------------------------------|------------|-----------------|
| Disease area                                             |            |                 |
| Solid cancer                                             | 70         | (70.0%)         |
| Hematologic cancer                                       | 21         | (21.0%)         |
| Non-cancer                                               | 9          | (9.0%)          |
| Treatment type                                           |            |                 |
| Monotherapy                                              | 82         | (82.0%)         |
| Combination                                              | 18         | (18.0%)         |
| Line of treatment                                        |            |                 |
| 1 <sup>st</sup> line                                     | 38         | (38.0%)         |
| 2 <sup>nd</sup> , 3 <sup>rd</sup> , 4 <sup>th</sup> line | 62         | (62.0%)         |
| FDA launch sequence                                      |            |                 |
| 1 <sup>st</sup> indication                               | 25         | (25.0%)         |
| 2 <sup>nd</sup> indication                               | 24         | (24.0%)         |
| ≥3 <sup>rd</sup> indication                              | 47         | (47.0%)         |
| Not launched                                             | 4          | (4.0%)          |
| Country                                                  |            |                 |
| England (NICE)                                           | 67         | (67.0%)         |
| Scotland (SMC)                                           | 68         | (68.0%)         |
| France (HAS)                                             | 78         | (78.0%)         |
| Germany (G-BA)                                           | 80         | (80.0%)         |
| Canada (CADTH)                                           | 57         | (57.0%)         |
| Australia (PBAC)                                         | 63         | (63.0%)         |
| US (FDA)                                                 | 96         | (96.0%)         |
| <b>Total no. of indications</b>                          | <b>100</b> | <b>(100.0%)</b> |

**Table e5** Sample overview

CADTH: Canadian Agency for Drugs and Technologies in Health; FDA: US Food & Drug Administration; G-BA: Federal joint Committee (“*Gemeinsamer Bundesausschuss*”); HAS: Haute Autorité de Santé; NICE: National Institute for Health and Care Excellence; PBAC: Pharmaceutical Benefits Advisory Committee; SMC: Scottish Medicines Consortium.

| Country                         | 1 <sup>st</sup> indication |              | 2 <sup>nd</sup> indication |              | ≥3 <sup>rd</sup> indication |              | Not launched |              |
|---------------------------------|----------------------------|--------------|----------------------------|--------------|-----------------------------|--------------|--------------|--------------|
|                                 | No.                        | (%)          | No.                        | (%)          | No.                         | (%)          | No.          | (%)          |
| England (NICE)                  | 25                         | (25%)        | 18                         | (18%)        | 24                          | (24%)        | 33           | (33%)        |
| Scotland (SMC)                  | 25                         | (25%)        | 16                         | (16%)        | 27                          | (27%)        | 32           | (32%)        |
| France (HAS)                    | 27                         | (27%)        | 21                         | (21%)        | 30                          | (30%)        | 22           | (22%)        |
| Germany (G-BA)                  | 27                         | (27%)        | 21                         | (21%)        | 32                          | (32%)        | 20           | (20%)        |
| Canada (CADTH)                  | 18                         | (18%)        | 13                         | (13%)        | 26                          | (26%)        | 43           | (43%)        |
| Australia (PBAC)                | 25                         | (25%)        | 11                         | (11%)        | 27                          | (27%)        | 37           | (37%)        |
| USA (FDA)                       | 25                         | (25%)        | 24                         | (24%)        | 47                          | (47%)        | 4            | (4%)         |
| <b>Total no. of indications</b> | <b>172</b>                 | <b>(25%)</b> | <b>124</b>                 | <b>(18%)</b> | <b>213</b>                  | <b>(30%)</b> | <b>191</b>   | <b>(27%)</b> |

**Table e6** Number of indication launches by country

CADTH: Canadian Agency for Drugs and Technologies in Health; FDA: US Food & Drug Administration; G-BA: Federal joint Committee (“*Gemeinsamer Bundesausschuss*”); HAS: Haute Autorité de Santé; NICE: National Institute for Health and Care Excellence; PBAC: Pharmaceutical Benefits Advisory Committee; SMC: Scottish Medicines Consortium.
